# Supplementary material for: Intermittent Fasting Attenuates Metabolic-Dysfunction-Associated Steatohepatitis by Enhancing the Hepatic Autophagy–Lysosome Pathway
Source: MDPI journal article supplement (doi:10.3390/nu15214574), 2023-10-27
Supplement: s1 [file s1]

## Supplementary figures

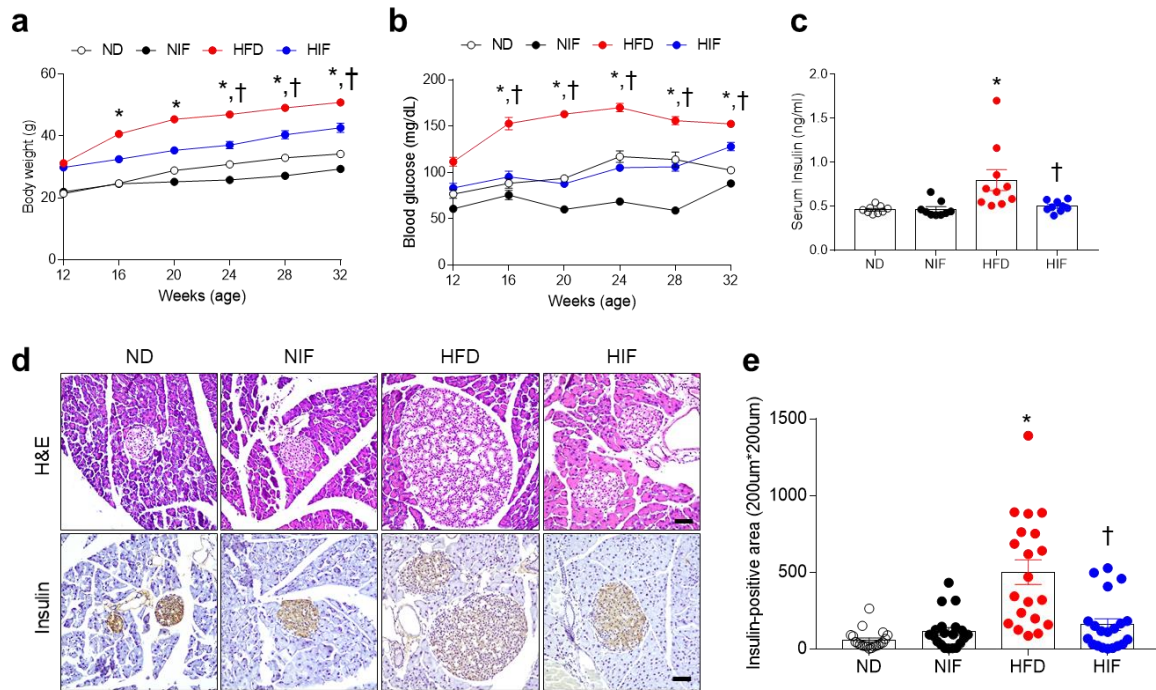

**Supplementary Figure S1.** IF attenuates body weight gain and improves insulin resistance in HFD-fed mice. **(a)** Body weight and **(b)** fasting blood glucose of mice after IF. **(c)** Serum insulin levels. **(d)** Representative microscopic images of mouse pancreatic sections stained with H&E and an anti-insulin antibody. **(e)** Percentage areas of insulin-positive cells. Data indicate the mean  $\pm$  SEM.  $*p < 0.05$  vs. ND-fed mice. Significance was determined with a two-way ANOVA.  $\dagger p < 0.05$  vs. HFD-fed mice. NIF: ND + IF, HIF: HFD + IF.

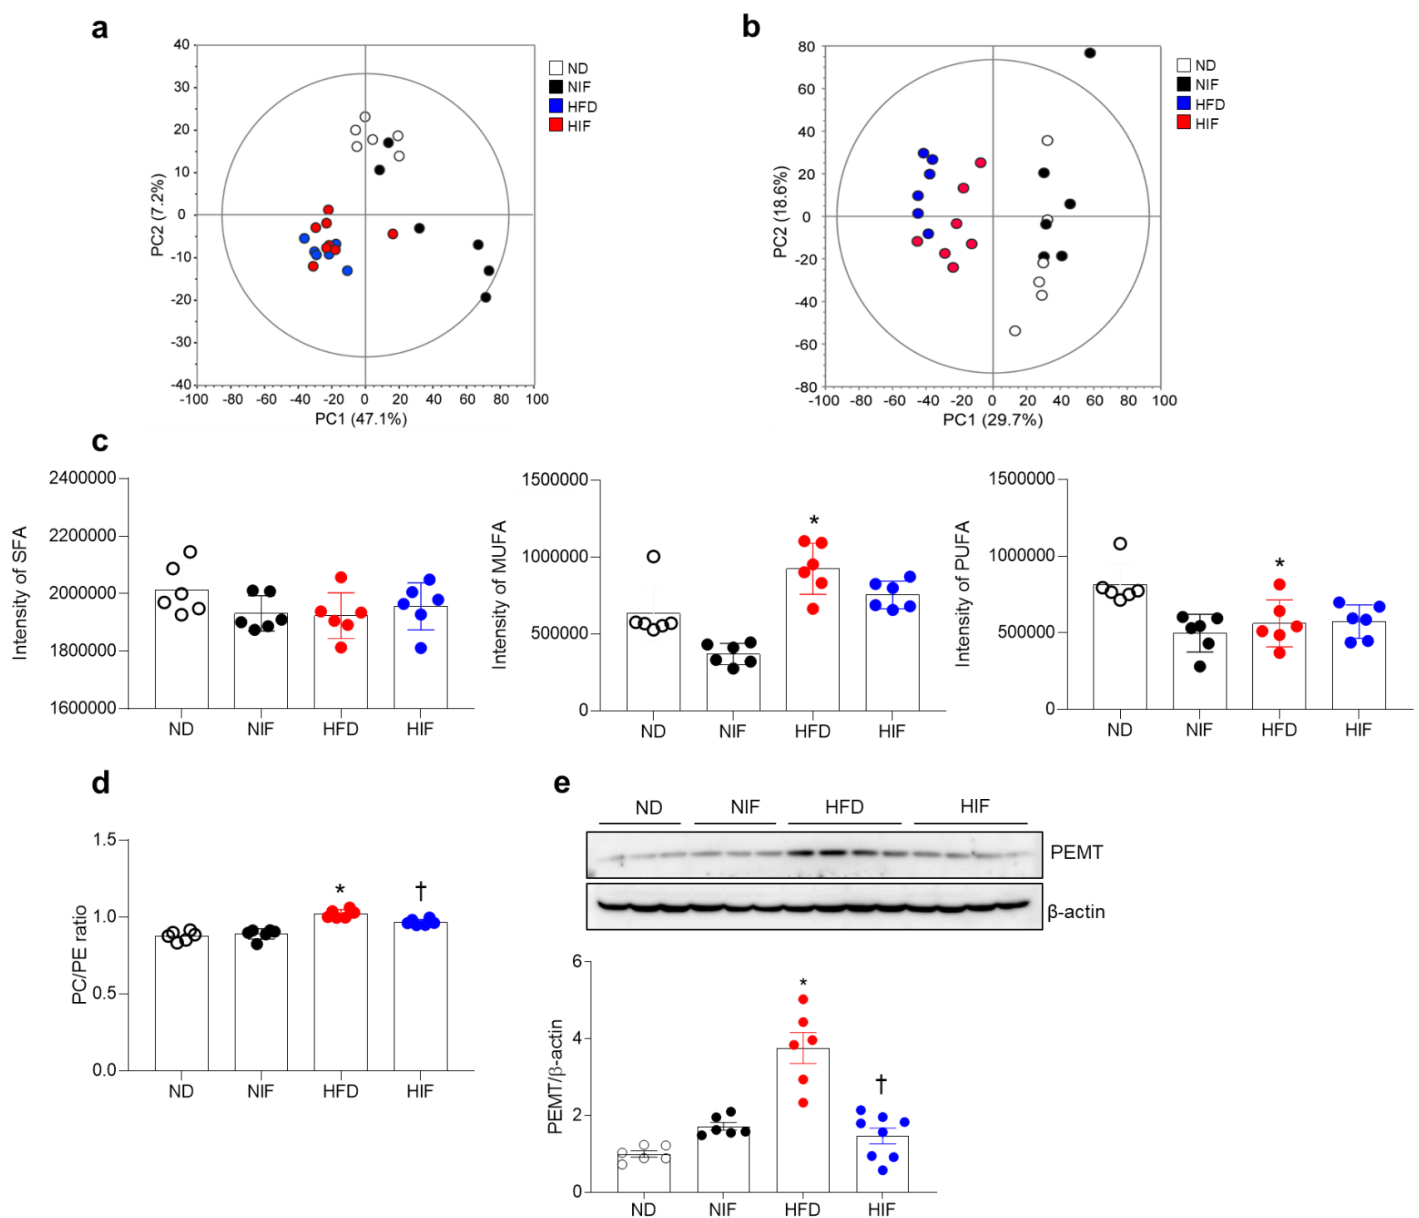

**Supplementary Figure S2.** IF changes the composition of FFAs in the liver of HFD-fed mice. **(a,b)** PCA of lipidomic data obtained using the positive-ion **(a)** and negative-ion modes **(b)**. The indicated groups are presented in different colors. **(c)** Saturated fatty acid, MUFA, and PUFA. **(d)** PC/PE ratio. **(e)** Western blot analysis and quantification of PEMT protein in liver lysates. β-Actin was used as a loading control. Data are shown as the mean ± SEM. Significance was determined with the two-way ANOVA. \**p* < 0.05 vs. ND-fed mice. †*p* < 0.05 vs. HFD-fed mice. NIF: ND + IF, HIF: HFD + IF.

**Supplementary Table S1. List of RT-PCR primers.**

| Gene Name                      | Primer Sequences (Mouse)                                                     |
|--------------------------------|------------------------------------------------------------------------------|
| <i>TNF-<math>\alpha</math></i> | Forward 5' CCAGACCCTCACACTCAGATC 3'<br>Reverse 5' CACTTGGTGGTTTGCTACGAC 3'   |
| <i>IL-6</i>                    | Forward 5' AGTTGCCTTCTTGGGACTGA 3'<br>Reverse 5' TCCACGATTTCCCAGAGAAC 3'     |
| <i>MCP-1</i>                   | Forward 5' CCACTCACCTGCTGCTACTCA 3'<br>Reverse 5' TGGTGATCCTCTTGTAGCTCTCC 3' |
| <i>IL-10</i>                   | Forward 5' CCAGGGAGATCCTTTGATGA 3'<br>Reverse 5' AACTGGCCACAGTTTTCAGG 3'     |
| <i>TGF-<math>\beta</math>1</i> | Forward 5' TGGAGCAACATGTGGAAGTC 3'<br>Reverse 5' CAGCAGCCGGTTACCAAG 3'       |
| <i>Gapdh</i>                   | Forward 5' AAATGGTGAAGGTCGGTGTG 3'<br>Reverse 5' CATGTAGTTGAGGTCAATGAAGG 3'  |

**Supplementary Table S2. List of primary antibodies.**

| <b>Antibody</b> | <b>Company</b> | <b>Catalog No.</b> | <b>Dilution(s)</b> | <b>Applications</b> | <b>Source</b> |
|-----------------|----------------|--------------------|--------------------|---------------------|---------------|
| Insulin         | Abcam          | ab7842             | 1:200              | IHC                 | G. Pig        |
| GS              | Santa Cruz     | sc-74430           | 1:200              | IF                  | Mouse         |
| Perilipin-2     | Abcam          | ab52356            | 1:2000, 1:200      | WB, IF              | Rabbit        |
| CD36            | Novus          | NB400              | 1:1000             | WB                  | Rabbit        |
| FAS             | Cell signaling | #3189              | 1:1,000            | WB                  | Rabbit        |
| SCD1            | Cell signaling | #2438              | 1:1,000            | WB                  | Rabbit        |
| PPAR- $\alpha$  | Abcam          | Ab8934             | 1:1000             | WB                  | Rabbit        |
| PPAR- $\lambda$ | Santa Cruz     | sc-7196            | 1:1000             | WB                  | Rabbit        |
| LC3B            | Cell signaling | #83506             | 1:1000             | WB                  | Mouse         |
| p62             | Sigma          | P0067              | 1:1000             | WB                  | Rabbit        |
| LAMP1           | Abcam          | ab24170            | 1:1000             | WB                  | Rabbit        |
| LAL             | Santa Cruz     | sc-58374           | 1:1000             | WB                  | Mouse         |
| PEMT            | LSBio          | LS-C163519         | 1:1000             | WB                  | Rabbit        |
| Galectin-3      | Santa Cruz     | sc-23938           | 1:1000, 1:200      | WB, IF              | Rat           |
| LCN2            | R&D            | AF1857             | 1:1000             | WB                  | Goat          |
| MMP9            | Abcam          | ab38898            | 1:1,000            | WB                  | Rabbit        |
| pSTAT3          | Cell signaling | #9134              | 1:1,000            | WB                  | Rabbit        |
| STAT3           | Cell signaling | #9139              | 1:1,000            | WB                  | Mouse         |
| Lumican         | Abcam          | ab168348           | 1:1000             | WB                  | Rabbit        |
| HO-1            | Enzo           | ADI-SPA-895        | 1:1,000            | WB                  | Rabbit        |
| F4/80           | Santa Cruz     | sc-377009          | 1:100              | IF                  | Mouse         |
| $\beta$ -actin  | Sigma          | A5441              | 1:1,000            | WB                  | Mouse         |

WB, Western blot; IF, immunofluorescence; IHC, immunohistochemistry.

**Supplementary Table S3. Total identified lipids using UPLC/Q-TOF MS.**

| Class  | Name         | Mean±SEM            |                     |                    |                     | Fold change |         |
|--------|--------------|---------------------|---------------------|--------------------|---------------------|-------------|---------|
|        |              | ND                  | NIF                 | HFD                | HIF                 | HFD/ND      | HIF/HFD |
| FFA    | FFA 12:0     | 3899.18±125.49      | 3518.57±91.19       | 3605.90±109.10     | 3887.84±178.56      | 0.92        | 1.08    |
|        | FFA 14:0     | 13864.82±924.13     | 9880.76±417.04      | 11695.16±506.01    | 13032.51±1158.34    | 0.84        | 1.11    |
|        | FFA 14:1     | 9791.47±1492.60     | 5016.24±965.84      | 6795.90±408.76     | 7724.39±795.12      | 0.69        | 1.14    |
|        | FFA 14:2     | 4086.95±591.68      | 2492.11±496.47      | 1384.27±101.68     | 2552.62±165.08      | 0.34        | 1.84    |
|        | FFA 16:0     | 669588.84±29816.90  | 500824.52±23625.33  | 592455.83±29582.12 | 594764.14±28123.95  | 0.88        | 1.00    |
|        | FFA 16:1     | 96422.62±13007.65   | 42261.26±3604.63    | 92655.14±7834.12   | 65758.44±2997.89    | 0.96        | 0.71    |
|        | FFA 16:2     | 8891.81±385.17      | 4656.34±863.60      | 3562.95±262.82     | 4652.14±304.44      | 0.40        | 1.31    |
|        | FFA 16:3     | 2122.19±92.95       | 873.98±188.03       | 922.05±66.40       | 1101.45±76.78       | 0.43        | 1.19    |
|        | FFA 18:0     | 1310726.43±28824.81 | 1400590.36±37093.90 | 1296821.70±7252.34 | 1324520.46±16310.14 | 0.99        | 1.02    |
|        | FFA 18:1     | 512871.26±60701.66  | 306936.61±24725.05  | 795813.18±59833.12 | 660141.64±37963.02  | 1.55        | 0.83    |
|        | FFA 18:2     | 359852.29±27207.51  | 211911.98±25557.23  | 188131.94±26037.37 | 218587.06±22480.85  | 0.52        | 1.16    |
|        | FFA 18:3     | 55195.55±3351.24    | 25489.49±4003.74    | 14785.06±1745.81   | 21038.53±2073.56    | 0.27        | 1.42    |
|        | FFA 18:4     | 3595.21±207.78      | 1240.27±371.26      | 658.44±101.50      | 1267.38±164.32      | 0.18        | 1.92    |
|        | FFA 20:0     | 4561.25±219.04      | 5476.90±391.82      | 7180.79±1159.37    | 6464.51±622.82      | 1.57        | 0.90    |
|        | FFA 20:2     | 13668.96±1360.81    | 11722.10±857.48     | 13957.59±1144.34   | 14794.73±686.10     | 1.02        | 1.06    |
|        | FFA 20:3     | 13396.48±1467.18    | 10121.46±816.92     | 19878.68±1929.33   | 15616.92±1216.99    | 1.48        | 0.79    |
|        | FFA 20:4     | 118110.33±9731.01   | 77299.24±8543.37    | 125525.52±11433.47 | 108928.22±7010.62   | 1.06        | 0.87    |
|        | FFA 20:5     | 55741.29±7223.09    | 15637.50±2651.87    | 14496.28±1753.61   | 16748.63±1818.83    | 0.26        | 1.16    |
|        | FFA 22:0     | 1903.63±317.23      | 2136.61±162.78      | 2674.11±534.18     | 2225.43±421.46      | 1.40        | 0.83    |
|        | FFA 22:1     | 4348.17±437.59      | 5154.06±543.41      | 7410.37±1078.03    | 4466.34±480.37      | 1.70        | 0.60    |
|        | FFA 22:2     | 948.40±108.65       | 1326.63±173.51      | 1392.67±158.68     | 936.34±106.68       | 1.47        | 0.67    |
|        | FFA 22:3     | 778.79±82.55        | 963.61±72.04        | 1473.30±145.83     | 1044.28±85.34       | 1.89        | 0.71    |
|        | FFA 22:4     | 17710.80±1397.23    | 15793.98±1117.09    | 29224.63±2005.36   | 22084.25±526.23     | 1.65        | 0.76    |
|        | FFA 22:5     | 27531.87±2162.72    | 17185.84±1894.20    | 21957.23±1951.84   | 21303.22±1413.07    | 0.80        | 0.97    |
|        | FFA 22:6     | 122045.84±7543.46   | 89017.95±10359.98   | 113644.51±14084.34 | 112610.91±8739.23   | 0.93        | 0.99    |
|        | FFA 24:0     | 188.57±39.09        | 195.95±10.15        | 120.05±14.78       | 333.59±222.17       | 0.64        | 2.78    |
|        | FFA 24:1     | 2820.66±440.04      | 2054.93±97.00       | 3503.90±319.13     | 1800.73±88.33       | 1.24        | 0.51    |
|        | FFA 24:2     | 419.67±43.48        | 351.21±44.23        | 211.65±36.15       | 169.35±23.89        | 0.50        | 0.80    |
|        | FFA 24:4     | 1860.20±367.78      | 2753.58±473.25      | 2479.16±196.78     | 2071.78±261.05      | 1.33        | 0.84    |
|        | FFA 24:5     | 4315.04±642.22      | 4419.16±797.98      | 2401.85±231.49     | 2590.40±174.50      | 0.56        | 1.08    |
|        | FFA 24:6     | 3435.63±558.00      | 4484.64±534.76      | 4876.35±428.24     | 4137.09±177.97      | 1.42        | 0.85    |
|        | FFA 26:0     | 5300.57±256.35      | 5788.11±170.84      | 5215.98±80.88      | 6247.31±1214.86     | 0.98        | 1.20    |
|        | FFA 28:0     | 1341.29±92.97       | 1509.50±24.78       | 1193.73±18.42      | 1899.27±618.55      | 0.89        | 1.59    |
|        | FFA 30:0     | 790.88±59.27        | 931.62±39.56        | 799.59±42.36       | 1212.87±383.87      | 1.01        | 1.52    |
|        | FFA 32:1     | 1239.06±153.80      | 1386.07±142.71      | 2353.33±198.30     | 2206.51±539.19      | 1.90        | 0.94    |
|        | FFA 32:0     | 379.13±18.75        | 423.77±52.43        | 917.03±39.74       | 866.59±129.43       | 2.42        | 0.94    |
|        | FFA 34:0     | 448.38±18.93        | 562.86±16.71        | 629.99±17.91       | 630.27±57.84        | 1.41        | 1.00    |
|        | FFA 34:1     | 2997.98±339.39      | 3119.61±379.03      | 6944.07±487.96     | 5223.44±719.05      | 2.32        | 0.75    |
|        | FFA 36:1     | 2696.31±218.65      | 2694.37±252.82      | 7199.54±365.49     | 5056.04±676.80      | 2.67        | 0.70    |
|        | FFA 38:1     | 314.90±50.68        | 1078.10±217.13      | 1887.75±127.89     | 1608.28±250.71      | 5.99        | 0.85    |
| Cer    | Cer d42:2    | 15442.56±459.18     | 16027.75±338.89     | 15844.64±256.95    | 15819.60±456.30     | 1.03        | 1.00    |
| GlcCer | GlcCer d36:0 | 46040.13±1011.14    | 46094.56±522.53     | 45503.56±438.42    | 45525.15±153.03     | 0.99        | 1.00    |
| CL     | CL 72:3      | 89576.14±4252.73    | 81681.93±1838.20    | 53678.91±973.56    | 63913.12±926.59     | 0.60        | 1.19    |
|        | CL 72:4      | 1691.66±84.03       | 1713.73±58.63       | 1256.65±50.44      | 1394.91±37.50       | 0.74        | 1.11    |
|        | CL 72:7      | 783.03±47.00        | 642.95±53.78        | 497.56±28.87       | 547.88±19.16        | 0.64        | 1.10    |
| SM     | SM d34:1     | 2768.15±223.49      | 3017.95±82.64       | 2075.27±189.34     | 3170.44±175.39      | 0.75        | 1.53    |
|        | SM d34:2     | 3546.17±127.39      | 3484.03±119.85      | 3618.91±116.62     | 3273.80±39.14       | 1.02        | 0.90    |
|        | SM d36:1     | 65670.68±2312.89    | 66995.57±2703.68    | 96564.08±6000.37   | 137690.86±10415.73  | 1.47        | 1.43    |
|        | SM d40:1     | 4502.48±661.34      | 6178.49±743.39      | 2500.44±418.91     | 4808.71±648.35      | 0.56        | 1.92    |
|        | SM d42:1     | 1388199.05±55509.92 | 1510735.05±55711.85 | 783237.89±20384.03 | 985283.51±29472.98  | 0.56        | 1.26    |
|        | SM d42:2     | 4396.92±508.03      | 4780.25±163.83      | 2161.36±244.46     | 3188.51±341.08      | 0.49        | 1.48    |

|        |               |                     |                     |                     |                     |      |      |
|--------|---------------|---------------------|---------------------|---------------------|---------------------|------|------|
| LysoPA | LysoPA 16:0   | 8787.78±457.66      | 6483.75±736.94      | 8090.29±930.01      | 8077.61±550.57      | 0.92 | 1.00 |
|        | LysoPA 18:0   | 2956.38±120.26      | 3198.61±127.27      | 3490.45±14.88       | 3630.44±81.25       | 1.18 | 1.04 |
|        | LysoPA 18:1   | 1309.54±85.35       | 1326.12±34.46       | 1330.57±34.81       | 1262.29±17.81       | 1.02 | 0.95 |
| LysoPC | LysoPC 16:0   | 138029.16±14469.30  | 139925.77±4723.72   | 139234.80±3999.35   | 130748.83±1621.34   | 1.01 | 0.94 |
|        | LysoPC 16:1   | 5480.60±1047.92     | 4883.47±410.79      | 3774.67±122.03      | 3669.46±106.84      | 0.69 | 0.97 |
|        | LysoPC 18:0   | 111587.87±7485.16   | 123062.42±4918.81   | 127157.17±3514.99   | 142795.80±1061.83   | 1.14 | 1.12 |
|        | LysoPC 18:1   | 6783.95±441.58      | 8145.20±646.73      | 11637.01±323.99     | 9545.27±220.71      | 1.72 | 0.82 |
|        | LysoPC 18:2   | 28613.36±2356.21    | 30991.94±1638.94    | 15584.22±744.82     | 21776.07±566.04     | 0.54 | 1.40 |
|        | LysoPC 20:0   | 1647.67±217.98      | 2674.08±462.64      | 1465.56±202.42      | 1541.48±229.08      | 0.89 | 1.05 |
|        | LysoPC 20:1   | 1052.58±160.97      | 1163.97±167.24      | 1108.46±76.66       | 865.61±36.74        | 1.05 | 0.78 |
|        | LysoPC 20:3   | 1369.56±156.01      | 2235.21±247.50      | 2335.57±91.49       | 2263.20±157.85      | 1.71 | 0.97 |
|        | LysoPC 20:4   | 28855.71±2699.89    | 28982.03±1278.87    | 30831.43±1124.37    | 33715.84±1094.93    | 1.07 | 1.09 |
|        | LysoPC 22:0   | 373.78±34.06        | 610.29±85.96        | 156.53±18.06        | 314.29±22.88        | 0.42 | 2.01 |
|        | LysoPC 22:6   | 10334.72±1043.00    | 11241.45±673.03     | 11082.78±430.89     | 11978.04±311.24     | 1.07 | 1.08 |
|        | LysoPC 24:0   | 565.11±60.21        | 647.76±31.33        | 166.33±14.34        | 480.98±34.48        | 0.29 | 2.89 |
| LysoPE | LysoPC O-16:0 | 104.80±32.49        | 189.37±37.13        | 160.34±29.81        | 233.38±25.76        | 1.53 | 1.46 |
|        | LysoPE 18:0   | 15462.80±2558.33    | 22614.25±1481.10    | 20179.39±1021.07    | 26149.06±2584.39    | 1.31 | 1.30 |
|        | LysoPE 18:1   | 8568.71±2143.08     | 8772.87±860.89      | 8509.46±320.11      | 8998.71±240.52      | 0.99 | 1.06 |
|        | LysoPE 18:2   | 3025.23±629.32      | 1965.45±167.89      | 781.59±116.48       | 1342.18±70.33       | 0.26 | 1.72 |
|        | LysoPE 20:4   | 7288.07±919.67      | 7243.72±358.91      | 6629.46±458.96      | 7685.77±227.05      | 0.91 | 1.16 |
| PC     | PC 30:0       | 37894.81±1185.50    | 40193.22±1373.34    | 21170.87±1593.40    | 29446.24±660.40     | 0.56 | 1.39 |
|        | PC 32:0       | 3933.71±334.07      | 4401.88±215.33      | 2142.66±171.36      | 3237.09±296.32      | 0.54 | 1.51 |
|        | PC 32:1       | 482183.18±5170.81   | 478597.98±4231.44   | 419020.10±4140.17   | 450654.53±5502.30   | 0.87 | 1.08 |
|        | PC 32:2       | 39933.73±1644.67    | 33663.63±3254.73    | 17123.04±765.48     | 18400.81±792.34     | 0.43 | 1.07 |
|        | PC 34:0       | 229139.31±5683.42   | 267405.51±8273.37   | 215077.42±5427.37   | 247980.54±5893.22   | 0.94 | 1.15 |
|        | PC 34:1       | 20567.99±1865.69    | 22772.74±809.45     | 17674.37±1686.66    | 25166.31±1895.14    | 0.86 | 1.42 |
|        | PC 34:2       | 84205.91±7759.01    | 88241.60±3567.27    | 25802.42±3632.34    | 57953.57±4859.56    | 0.31 | 2.25 |
|        | PC 34:3       | 163439.21±10043.95  | 138196.30±7621.75   | 103651.88±5384.07   | 103768.10±4522.08   | 0.63 | 1.00 |
|        | PC 34:4       | 9654.32±685.46      | 4457.90±513.64      | 135.50±58.71        | 353.70±87.92        | 0.01 | 2.61 |
|        | PC 36:1       | 2827.19±184.64      | 2884.99±158.13      | 2326.21±193.30      | 3317.41±190.81      | 0.82 | 1.43 |
|        | PC 36:2       | 1486480.48±38874.79 | 1569245.96±29511.16 | 1092743.88±31819.72 | 1432524.91±24163.70 | 0.74 | 1.31 |
|        | PC 36:3       | 12597.22±1210.23    | 12105.91±958.99     | 3508.98±414.87      | 7168.60±656.44      | 0.28 | 2.04 |
|        | PC 36:4       | 49651.66±4471.35    | 51550.47±1292.95    | 30280.86±2523.60    | 54068.00±4852.19    | 0.61 | 1.79 |
|        | PC 36:5       | 99246.76±8356.13    | 86512.48±5886.41    | 9799.64±1261.13     | 23237.98±1539.35    | 0.10 | 2.37 |
|        | PC 38:3       | 1873.78±228.43      | 1974.07±97.49       | 1426.53±132.57      | 2194.75±282.03      | 0.76 | 1.54 |
|        | PC 38:4       | 3027421.24±44426.65 | 3136538.59±39066.66 | 3168679.18±63911.02 | 3296689.04±25634.19 | 1.05 | 1.04 |
|        | PC 38:5       | 13532.90±1372.84    | 13511.03±536.62     | 6290.38±590.34      | 11247.88±1099.64    | 0.46 | 1.79 |
|        | PC 38:6       | 2057251.56±47282.70 | 2175314.21±43367.24 | 1893740.48±16714.58 | 2134083.01±30103.73 | 0.92 | 1.13 |
|        | PC 38:7       | 27915.86±3289.78    | 32148.38±1335.80    | 3382.29±563.38      | 11375.73±893.21     | 0.12 | 3.36 |
|        | PC 40:3       | 34983.78±1005.09    | 40386.81±2319.71    | 29686.98±602.50     | 30867.90±1468.91    | 0.85 | 1.04 |
|        | PC 40:4       | 33278.79±444.86     | 34491.10±1175.13    | 37820.13±2332.56    | 39903.08±663.70     | 1.14 | 1.06 |
|        | PC 40:5       | 44348.63±1347.78    | 42200.62±1779.94    | 40768.23±1218.29    | 30890.78±810.08     | 0.92 | 0.76 |
|        | PC 40:6       | 706406.65±37839.68  | 702821.75±27714.93  | 632132.94±16121.36  | 744041.05±12723.54  | 0.89 | 1.18 |
|        | PC 40:7       | 473997.86±16088.98  | 459028.31±16193.63  | 418720.63±6789.86   | 442978.83±6966.24   | 0.88 | 1.06 |
|        | PC 40:8       | 110821.85±12758.47  | 136664.58±10323.35  | 65796.58±1477.05    | 106429.40±4793.60   | 0.59 | 1.62 |
|        | PC 42:5       | 12120.85±573.11     | 13146.86±578.23     | 9980.76±239.44      | 9500.36±240.20      | 0.82 | 0.95 |
|        | PC 42:6       | 27548.95±1541.49    | 37204.67±3264.97    | 23400.08±1411.73    | 24588.66±2308.37    | 0.85 | 1.05 |
|        | PC 42:8       | 5583.41±329.39      | 5950.72±193.83      | 5352.04±113.89      | 5613.03±89.42       | 0.96 | 1.05 |
|        | PC 42:10      | 26774.48±4719.40    | 54872.63±5607.98    | 26652.99±1072.90    | 48286.94±2543.89    | 1.00 | 1.81 |
| PC-O   | PC O-34:1     | 97582.06±3325.17    | 97744.72±2994.46    | 91084.60±2893.75    | 84328.41±1413.95    | 0.93 | 0.93 |
|        | PC O-34:2     | 541.23±31.33        | 543.06±30.49        | 607.07±42.15        | 536.91±27.61        | 1.12 | 0.88 |
|        | PC O-36:2     | 190823.37±9011.51   | 184804.53±10617.29  | 112137.36±4073.03   | 162259.22±5010.01   | 0.59 | 1.45 |
|        | PC O-36:3     | 8918.12±224.48      | 9591.39±259.00      | 10160.53±232.05     | 9139.23±171.14      | 1.14 | 0.90 |
|        | PC O-36:4     | 13349.47±243.12     | 13849.03±439.79     | 15849.75±285.38     | 14870.98±337.77     | 1.19 | 0.94 |
|        | PC O-40:7     | 7316.37±280.50      | 7195.36±185.94      | 7960.27±287.57      | 6860.18±76.06       | 1.09 | 0.86 |

|      |           |                     |                     |                     |                     |      |      |
|------|-----------|---------------------|---------------------|---------------------|---------------------|------|------|
| PE   | PE 32:2   | 1588.77±156.56      | 426.81±68.04        | 9.99±3.93           | 36.39±8.82          | 0.01 | 3.64 |
|      | PE 34:1   | 128081.57±17796.76  | 100718.91±3402.53   | 85876.79±3406.29    | 87019.52±1859.42    | 0.67 | 1.01 |
|      | PE 34:3   | 97244.00±7359.19    | 52052.88±3305.09    | 11012.95±467.02     | 18451.16±589.10     | 0.11 | 1.68 |
|      | PE 36:0   | 15703.41±598.23     | 19219.68±854.24     | 13200.31±671.89     | 17292.04±883.94     | 0.84 | 1.31 |
|      | PE 36:1   | 141826.30±17158.88  | 136607.58±3541.80   | 105072.29±6794.54   | 134339.93±5756.00   | 0.74 | 1.28 |
|      | PE 36:2   | 1166238.86±62683.24 | 1161537.69±41674.46 | 467707.19±28561.44  | 862000.76±22018.47  | 0.40 | 1.84 |
|      | PE 36:3   | 1109763.48±50325.77 | 913833.91±31175.97  | 401105.39±20962.54  | 616671.61±13630.76  | 0.36 | 1.54 |
|      | PE 36:5   | 67428.50±5139.32    | 62147.86±5079.99    | 28374.61±1426.33    | 43233.36±2560.20    | 0.42 | 1.52 |
|      | PE 38:1   | 72332.99±2343.48    | 69698.81±2457.02    | 90131.04±3051.59    | 91143.49±1551.43    | 1.25 | 1.01 |
|      | PE 38:3   | 262640.89±18760.57  | 318688.76±10982.66  | 226671.78±8124.03   | 276176.50±10963.25  | 0.86 | 1.22 |
|      | PE 38:4   | 3288071.62±55941.78 | 3726283.71±34755.93 | 3075902.07±27974.73 | 3513669.57±22239.95 | 0.94 | 1.14 |
|      | PE 38:6   | 2475956.59±29930.28 | 2540122.50±27742.72 | 2108650.04±40094.04 | 2392446.79±32743.62 | 0.85 | 1.13 |
|      | PE 38:7   | 121443.58±4738.17   | 83640.60±4651.23    | 38447.91±1717.67    | 44373.30±2779.20    | 0.32 | 1.15 |
|      | PE 40:3   | 69137.99±3142.76    | 77912.68±2989.83    | 96634.59±1777.72    | 90930.09±5518.60    | 1.40 | 0.94 |
|      | PE 40:4   | 174619.37±4325.32   | 205775.94±5416.37   | 158993.52±8097.94   | 183904.52±5360.77   | 0.91 | 1.16 |
|      | PE 40:5   | 66415.30±1674.34    | 65212.95±2632.83    | 74318.36±2719.72    | 72069.88±2128.92    | 1.12 | 0.97 |
|      | PE 40:6   | 63144.78±1098.64    | 65422.03±2287.13    | 41076.36±1437.50    | 44722.36±1217.28    | 0.65 | 1.09 |
|      | PE 40:7   | 1204422.62±19698.20 | 1144324.86±36425.89 | 1077235.44±34658.32 | 1143673.38±23862.46 | 0.89 | 1.06 |
|      | PE 40:8   | 80190.11±7162.64    | 98450.26±4052.70    | 35959.41±1633.60    | 60354.25±2197.27    | 0.45 | 1.68 |
|      | PE 42:8   | 14301.81±590.78     | 16031.89±517.75     | 15560.72±527.45     | 13189.37±340.16     | 1.09 | 0.85 |
|      | PE 42:9   | 8392.22±436.01      | 12253.39±706.99     | 7297.91±202.08      | 9466.75±299.23      | 0.87 | 1.30 |
|      | PE 42:10  | 5378.37±707.99      | 11957.94±1625.69    | 3455.57±227.57      | 8049.45±551.28      | 0.64 | 2.33 |
| PE-O | PE O-36:5 | 314014.32±7195.41   | 352645.86±9897.82   | 303389.37±10252.97  | 296673.38±7201.34   | 0.97 | 0.98 |
|      | PE O-38:2 | 18237.41±760.30     | 19575.92±306.34     | 18944.79±589.12     | 18431.14±582.54     | 1.04 | 0.97 |
|      | PE O-38:4 | 21231.63±1178.13    | 19647.88±542.79     | 12382.36±338.15     | 15041.44±608.48     | 0.58 | 1.21 |
|      | PE O-38:5 | 252182.75±6542.96   | 288899.07±6905.24   | 325466.16±8561.95   | 409733.99±12477.23  | 1.29 | 1.26 |
|      | PE O-40:4 | 67365.08±1462.98    | 79537.15±1827.78    | 90142.70±1766.53    | 86527.53±2174.33    | 1.34 | 0.96 |
|      | PE O-40:6 | 57040.89±1099.78    | 59178.29±811.72     | 53496.91±600.14     | 62749.97±1564.44    | 0.94 | 1.17 |
| PG   | PG 36:2   | 11063.02±650.90     | 13008.16±913.02     | 5374.60±432.57      | 13257.04±1017.08    | 0.49 | 2.47 |
|      | PG 36:3   | 18474.37±944.74     | 20572.44±1933.10    | 30333.39±991.69     | 30451.90±2376.45    | 1.64 | 1.00 |
|      | PG 36:4   | 14151.78±1404.01    | 11837.62±2020.18    | 6530.40±343.33      | 10233.75±900.61     | 0.46 | 1.57 |
|      | PG 38:4   | 4850.65±257.52      | 5302.89±375.55      | 4993.70±185.17      | 6822.42±487.70      | 1.03 | 1.37 |
|      | PG 38:5   | 7559.20±606.60      | 7811.06±531.07      | 22007.56±1241.20    | 16668.60±1011.44    | 2.91 | 0.76 |
|      | PG 38:6   | 5881.22±367.71      | 4874.33±439.90      | 6129.47±341.68      | 6287.62±390.83      | 1.04 | 1.03 |
|      | PG 40:6   | 1776.06±146.90      | 1854.37±276.42      | 1717.14±171.11      | 1730.13±185.91      | 0.97 | 1.01 |
|      | PG 40:7   | 25403.07±2905.55    | 33150.07±2373.66    | 75256.61±5436.44    | 68995.59±4609.63    | 2.96 | 0.92 |
|      | PG 40:8   | 38357.49±3320.44    | 39429.19±3842.92    | 38233.60±1769.50    | 47639.24±2171.48    | 1.00 | 1.25 |
|      | PG 42:8   | 1087.58±178.87      | 641.63±135.92       | 2361.68±395.22      | 2023.77±180.88      | 2.17 | 0.86 |
|      | PG 42:10  | 9131.33±1365.62     | 8930.69±820.11      | 18517.82±1570.55    | 17266.04±1096.62    | 2.03 | 0.93 |
|      | PG 44:11  | 1697.99±625.31      | 3719.54±935.83      | 7040.09±964.18      | 6503.97±459.04      | 4.15 | 0.92 |
|      | PG 44:12  | 41180.39±6848.81    | 53186.37±6256.86    | 80012.16±6346.52    | 79777.00±4122.20    | 1.94 | 1.00 |
| PI   | PI 38:4   | 84340.25±6873.82    | 128224.00±10807.15  | 132763.40±7233.61   | 125740.63±17272.75  | 1.57 | 0.95 |
|      | PI 38:5   | 5073.48±770.11      | 6872.28±1148.49     | 5812.51±461.24      | 4416.72±761.57      | 1.15 | 0.76 |
| PS   | PS 36:4   | 2167.51±343.70      | 2776.70±345.75      | 1861.95±182.74      | 2097.80±413.93      | 0.86 | 1.13 |
|      | PS 38:6   | 2278.55±227.52      | 2635.29±275.46      | 1571.66±139.31      | 1683.86±196.19      | 0.69 | 1.07 |
|      | PS 40:6   | 12371.38±377.68     | 16168.27±1297.26    | 11448.76±828.97     | 13253.38±1254.37    | 0.93 | 1.16 |
|      | PS 44:12  | 4361.72±176.88      | 4829.58±148.60      | 1997.81±171.95      | 3304.70±148.90      | 0.46 | 1.65 |
| DAG  | DAG 42:6  | 23504.27±333.25     | 24929.00±734.55     | 22782.00±215.72     | 22944.80±363.85     | 0.97 | 1.01 |

|     |           |                      |                     |                      |                      |      |      |
|-----|-----------|----------------------|---------------------|----------------------|----------------------|------|------|
| TAG | TAG 42:0  | 96842.48±1842.96     | 100088.38±1253.20   | 94422.05±1107.45     | 94060.40±703.16      | 0.98 | 1.00 |
|     | TAG 46:0  | 124704.18±4013.91    | 126235.78±1658.70   | 114653.33±1200.95    | 114931.87±884.55     | 0.92 | 1.00 |
|     | TAG 46:1  | 86588.88±3805.91     | 85355.57±1225.76    | 79449.02±1001.00     | 80587.19±916.86      | 0.92 | 1.01 |
|     | TAG 46:2  | 20319.87±1247.63     | 19327.05±310.17     | 17950.08±184.08      | 17992.99±390.93      | 0.88 | 1.00 |
|     | TAG 46:4  | 7770.14±218.79       | 7662.76±191.83      | 7064.22±97.58        | 7294.16±83.34        | 0.91 | 1.03 |
|     | TAG 48:0  | 75991.15±2755.51     | 75701.32±1389.35    | 75969.49±928.28      | 75374.16±1177.54     | 1.00 | 0.99 |
|     | TAG 48:1  | 97545.18±6731.45     | 83902.81±2609.40    | 110252.43±2474.97    | 101335.38±6423.93    | 1.13 | 0.92 |
|     | TAG 48:2  | 84536.33±6262.84     | 65573.26±2193.84    | 79280.15±2235.89     | 74007.67±3820.08     | 0.94 | 0.93 |
|     | TAG 48:3  | 18543.51±2163.99     | 12194.79±816.97     | 13039.22±385.23      | 12605.99±598.95      | 0.70 | 0.97 |
|     | TAG 48:4  | 5855.19±603.37       | 3793.78±191.02      | 3767.01±92.00        | 3790.96±183.54       | 0.64 | 1.01 |
|     | TAG 50:0  | 51431.86±1218.67     | 51309.67±732.59     | 51965.65±950.59      | 51635.14±470.32      | 1.01 | 0.99 |
|     | TAG 50:1  | 105290.30±9811.47    | 75640.01±11123.74   | 376112.64±10900.91   | 291694.29±41716.49   | 3.57 | 0.78 |
|     | TAG 50:2  | 363865.58±37905.30   | 193237.72±38442.67  | 651593.52±31879.67   | 520694.86±72066.63   | 1.79 | 0.80 |
|     | TAG 50:3  | 197984.95±28235.53   | 69887.78±20251.18   | 177853.81±11529.84   | 150747.70±20703.88   | 0.90 | 0.85 |
|     | TAG 50:4  | 54867.67±8574.20     | 21013.01±4592.35    | 31087.66±1874.19     | 29251.90±2722.58     | 0.57 | 0.94 |
|     | TAG 50:8  | 91387.31±2989.65     | 85890.80±1302.13    | 83340.81±877.21      | 83480.77±1153.90     | 0.91 | 1.00 |
|     | TAG 52:0  | 29490.63±566.23      | 28862.36±494.88     | 28384.98±353.67      | 28562.70±319.37      | 0.96 | 1.01 |
|     | TAG 52:1  | 28701.76±2657.23     | 26518.40±2158.20    | 86390.68±4200.68     | 77701.42±7908.61     | 3.01 | 0.90 |
|     | TAG 52:2  | 446909.84±61251.53   | 227225.79±65558.14  | 1968004.85±88571.25  | 1626254.20±186917.06 | 4.40 | 0.83 |
|     | TAG 52:3  | 1240209.48±103448.07 | 603611.53±220916.13 | 1989310.86±132010.78 | 1936975.65±180241.30 | 1.60 | 0.97 |
|     | TAG 52:4  | 1243805.27±139818.40 | 541096.95±207827.35 | 772512.73±86753.21   | 897559.75±85246.27   | 0.62 | 1.16 |
|     | TAG 52:5  | 189855.29±28071.58   | 68235.08±26144.22   | 74897.45±7799.05     | 89584.99±7847.54     | 0.39 | 1.20 |
|     | TAG 52:6  | 16336.06±1519.67     | 9240.24±1535.86     | 10350.57±454.21      | 11162.43±534.33      | 0.63 | 1.08 |
|     | TAG 54:0  | 11260.48±386.22      | 11209.97±272.31     | 10287.73±196.21      | 10562.22±310.76      | 0.91 | 1.03 |
|     | TAG 54:1  | 19196.69±3037.85     | 18498.49±1265.42    | 27120.43±2001.15     | 26818.56±2112.61     | 1.41 | 0.99 |
|     | TAG 54:2  | 43641.43±5283.37     | 35752.72±4463.61    | 170409.78±10220.26   | 142329.50±16776.42   | 3.90 | 0.84 |
|     | TAG 54:3  | 174305.44±16682.35   | 106174.23±24050.84  | 678385.10±54823.92   | 554586.85±69654.89   | 3.89 | 0.82 |
|     | TAG 54:4  | 435645.60±42167.18   | 232817.00±66822.96  | 670638.57±65453.20   | 672532.97±66543.03   | 1.54 | 1.00 |
|     | TAG 54:5  | 59912.36±3265.32     | 39541.81±6083.00    | 124660.24±3677.03    | 108788.73±13088.46   | 2.08 | 0.87 |
|     | TAG 54:6  | 201509.70±29960.89   | 89738.21±31155.77   | 53499.78±5543.88     | 72466.03±6713.30     | 0.27 | 1.35 |
|     | TAG 54:7  | 36630.65±6042.60     | 15032.32±5116.49    | 6494.37±515.41       | 8464.74±655.04       | 0.18 | 1.30 |
|     | TAG 54:8  | 12162.11±1580.84     | 5356.13±1269.13     | 4820.94±271.71       | 5203.65±325.47       | 0.40 | 1.08 |
|     | TAG 56:0  | 4818.80±270.96       | 4836.00±125.79      | 4198.58±164.29       | 4613.34±129.40       | 0.87 | 1.10 |
|     | TAG 56:4  | 28551.99±2252.53     | 20115.35±4768.56    | 75592.17±5996.79     | 65527.68±7505.26     | 2.65 | 0.87 |
|     | TAG 56:6  | 8719.59±895.01       | 5240.27±1430.95     | 13798.78±1094.32     | 12512.78±967.47      | 1.58 | 0.91 |
|     | TAG 56:7  | 106285.89±12013.93   | 60391.01±19363.68   | 189867.15±14965.69   | 164923.99±16452.37   | 1.79 | 0.87 |
|     | TAG 56:8  | 182711.89±20667.12   | 83966.70±29112.96   | 93429.84±11359.53    | 105861.90±9389.49    | 0.51 | 1.13 |
|     | TAG 56:9  | 16363.98±2328.18     | 5536.79±2121.79     | 5152.81±503.62       | 5515.15±589.32       | 0.31 | 1.07 |
|     | TAG 58:7  | 4181.61±179.47       | 3573.82±531.79      | 8199.49±782.23       | 6655.26±368.64       | 1.96 | 0.81 |
|     | TAG 58:8  | 36525.11±4132.16     | 24707.57±6526.10    | 50935.72±3843.09     | 45898.58±4346.02     | 1.39 | 0.90 |
|     | TAG 58:9  | 56636.93±8082.00     | 31248.40±10099.21   | 29959.34±3441.03     | 34566.14±3244.16     | 0.53 | 1.15 |
|     | TAG 58:10 | 20648.32±3374.33     | 9303.71±3475.29     | 4262.93±688.14       | 6285.07±702.08       | 0.21 | 1.47 |
|     | TAG 58:11 | 3373.27±457.27       | 1312.36±462.76      | 487.83±41.53         | 874.80±134.75        | 0.14 | 1.79 |
